# Supplementary material for: Computing irreversible minimal cut sets in genome-scale metabolic networks via flux cone projection
Source: Oxford University Press journal article supplement (doi:10.1093/bioinformatics/bty1027), 2018-12-15
Supplement: bioinformatics_35_15_2618_s6.pdf [file bioinformatics_35_15_2618_s6.pdf]

## 1 EFMs of the example

We consider the network  $\mathcal{N} = (\mathfrak{M}, \mathfrak{R}, S, \text{Irr})$  in Fig. 1 of the main text with the stoichiometric matrix

$$S = \begin{pmatrix} 1 & -1 & 0 & 0 & 0 & 0 & 0 & 0 & 0 & 0 & 0 & 0 \\ 0 & 1 & -1 & 0 & -1 & 0 & 0 & 0 & 0 & 0 & 0 & 0 \\ 0 & 1 & 0 & -1 & 0 & -1 & 0 & 0 & 0 & 0 & 0 & 0 \\ 0 & 0 & 0 & 0 & 1 & 0 & 0 & 1 & -1 & 0 & -1 & 0 \\ 0 & 0 & 0 & 0 & 0 & 1 & -1 & -1 & 0 & 0 & 0 & 0 \\ 0 & 0 & 0 & 0 & 0 & 0 & 0 & 0 & 0 & 0 & 1 & -1 \\ 0 & 0 & 0 & 0 & 0 & 0 & 0 & 0 & 1 & -1 & 0 & 0 \end{pmatrix}.$$

There exist 18 EFMs with the following supports:  $\{1, 2, 3, 4\}$ ,  $\{1, 2, 3, 5, 6, 8\}$ ,  $\{1, 2, 3, 6, 7\}$ ,  $\{1, 2, 3, 6, 8, 9, 10\}$ ,  $\{1, 2, 3, 6, 8, 11, 12\}$ ,  $\{1, 2, 4, 5, 9, 10\}$ ,  $\{1, 2, 4, 5, 11, 12\}$ ,  $\{1, 2, 5, 6, 7, 9, 10\}$ ,  $\{1, 2, 5, 6, 7, 11, 12\}$ ,  $\{1, 2, 5, 6, 8, 9, 10\}$ ,  $\{1, 2, 5, 6, 8, 11, 12\}$ ,  $\{3, 4, 5, 6, 8\}$ ,  $\{3, 5, 9, 10\}$ ,  $\{3, 5, 11, 12\}$ ,  $\{4, 6, 7\}$ ,  $\{4, 6, 8, 9, 10\}$ ,  $\{4, 6, 8, 11, 12\}$ ,  $\{9, 10, 11, 12\}$ . The sets  $\{3, 5, 9, 10\}$ ,  $\{3, 5, 11, 12\}$ ,  $\{9, 10, 11, 12\}$  correspond to reversible EFMs, which can carry flux in both directions.

The oriented circuits of the oriented matroid  $\mathcal{M}_S$  include these EFMs and the 6 signed sets  $\{-7, +8, +9, +10\}$ ,  $\{+1, +2, +4, +5, +7, -8\}$ ,  $\{-3, +5, +7, -8\}$ ,  $\{+1, +2, +5, +6, +7, -8\}$ ,  $\{+1, +2, +4, +5, -6, -8\}$ ,  $\{-7, +8, +11, +12\}$ , which do not correspond to a feasible flux vector. In each of these, there is an irreversible reaction with negative flux.

## 2 Oriented matroids

Let  $U$  be a set and  $\mathcal{C}$  a family of signed subsets of  $U$ . The pair  $\mathcal{M} = (U, \mathcal{C})$  is called an *oriented matroid* if the following *circuit axioms* are satisfied (Björner *et al.*, 1999):

1.  $\emptyset \notin \mathcal{C}$ .
2. If  $X \in \mathcal{C}$ , then  $-X \in \mathcal{C}$ .
3. For all  $X, Y \in \mathcal{C}$ , if  $\text{supp}(X) \subseteq \text{supp}(Y)$ , then  $X = Y$  or  $X = -Y$ .
4. For all  $X, Y \in \mathcal{C}$ ,  $X \neq -Y$  and  $u \in X^+ \cap Y^-$  there is a  $Z \in \mathcal{C}$  with  $Z^+ \subseteq (X^+ \cup Y^+) \setminus \{u\}$  and  $Z^- \subseteq (X^- \cup Y^-) \setminus \{u\}$ .

## 3 Contraction via deletion in the dual matroid

Let  $\mathcal{M} = (U, \mathcal{C})$  be an oriented matroid and let  $A \subseteq U$ . The family  $\mathcal{C} \setminus A = \{X \in \mathcal{C} \mid \text{supp}(X) \subseteq U \setminus A\}$  is the set of circuits of an oriented matroid  $\mathcal{M} \setminus A = (U \setminus A, \mathcal{C} \setminus A)$ , which is called the *deletion of  $A$  from  $\mathcal{M}$*  (Björner *et al.*, 1999, p. 110). An alternative notation for the contraction  $\text{contr}_H(\mathcal{M})$  of  $\mathcal{M} = (U, \mathcal{C})$  on  $H \subseteq U$  is to write  $\mathcal{M}/A$  with  $A = U \setminus H$  (Björner *et al.*, 1999, p. 111).

Proposition 3.4.9 in (Björner *et al.*, 1999, p. 123) states that for an oriented matroid  $\mathcal{M} = (U, \mathcal{C})$  and  $A \subseteq U$  we have

$$\begin{aligned} (\mathcal{M} \setminus A)^* &= \mathcal{M}^* / A \\ (\mathcal{M} / A)^* &= \mathcal{M}^* \setminus A, \end{aligned}$$

where  $\mathcal{M}^*$  is the dual oriented matroid of  $\mathcal{M}$ . Since  $\mathcal{M}^{**} = \mathcal{M}$ , the contraction of  $\mathcal{M}$  on  $H = U \setminus A$  can be realized by the deletion of  $A$  in the dual matroid  $\mathcal{M}^*$ .

If an oriented matroid  $\mathcal{M}_B = (U, \mathcal{C})$  is represented by a matrix  $B \in \mathbb{R}^{m \times |U|}$ , then the dual matroid  $\mathcal{M}_B^*$  can be obtained in the following way (Ziegler, 1995, p.166). Suppose the matrix  $B$  representing  $\mathcal{M}_B$  is given as  $B = (E_r \mid Q)$ , where  $E_r$  is the identity matrix of  $r$  elements. Then the dual matroid  $\mathcal{M}_B^*$  is represented by the matrix  $C = (-Q^T \mid E_{n-r})$ . Thus to compute the dual of the oriented matroid  $\mathcal{M}_B$  we have to bring  $B$  to the form  $B = (E_r \mid Q)$ , which can be done by Gaussian elimination.

To perform the contraction of  $\mathcal{M}_B$  on  $H = U \setminus A$ , we delete  $A$  in  $\mathcal{M}_B^*$ . This is done by removing in the matrix  $C \in \mathbb{R}^{|U| \times m}$  that represents  $\mathcal{M}_B^*$  the columns corresponding to  $A \subset U$ . Finally, we compute  $(\mathcal{M}_B^* \setminus A)^* = (\mathcal{M}_B / A)$ . Note that with this approach no combinatorial explosion will occur like in Fourier-Motzkin elimination.

*Example 1.* The oriented matroid  $\mathcal{M}_S = (\mathfrak{R}, \mathcal{C})$  we consider here is given by the set of reactions  $\mathfrak{R} = \{1, \dots, 12\}$  of the network in Fig. 1 of the main text and represented by its stoichiometric matrix  $S \in \mathbb{R}^{|\mathfrak{M}| \times |\mathfrak{R}|}$ , which can be found in Sect. 1 of the supplement.

To compute the dual matroid  $\mathcal{M}_S^*$  we have to bring  $S$  to the form  $(E_r \mid Q)$ , which can be done by first bringing the matrix into the reduced row echelon form, e.g. using Gaussian elimination. The result is the following matrix:

$$S^{\text{rref}} = \begin{pmatrix} \boxed{1} & \boxed{2} & \boxed{3} & \boxed{4} & \boxed{5} & \boxed{6} & \boxed{7} & \boxed{8} & \boxed{9} & \boxed{10} & \boxed{11} & \boxed{12} \\ 1 & 0 & 0 & -1 & 0 & 0 & -1 & -1 & 0 & 0 & 0 & 0 \\ 0 & 1 & 0 & -1 & 0 & 0 & -1 & -1 & 0 & 0 & 0 & 0 \\ 0 & 0 & 1 & -1 & 0 & 0 & -1 & -2 & 0 & 1 & 0 & 1 \\ 0 & 0 & 0 & 0 & 1 & 0 & 0 & 1 & 0 & -1 & 0 & -1 \\ 0 & 0 & 0 & 0 & 0 & 1 & -1 & -1 & 0 & 0 & 0 & 0 \\ 0 & 0 & 0 & 0 & 0 & 0 & 0 & 0 & 1 & -1 & 0 & 0 \\ 0 & 0 & 0 & 0 & 0 & 0 & 0 & 0 & 0 & 0 & 1 & -1 \end{pmatrix}$$

Since we want to have an identity matrix in the front we have to change the order of the columns of  $S^{\text{rref}}$ :

$$B = \begin{pmatrix} \boxed{1} & \boxed{2} & \boxed{3} & \boxed{5} & \boxed{6} & \boxed{9} & \boxed{11} & \boxed{4} & \boxed{7} & \boxed{8} & \boxed{10} & \boxed{12} \\ 1 & 0 & 0 & 0 & 0 & 0 & 0 & -1 & -1 & -1 & 0 & 0 \\ 0 & 1 & 0 & 0 & 0 & 0 & 0 & -1 & -1 & -1 & 0 & 0 \\ 0 & 0 & 1 & 0 & 0 & 0 & 0 & -1 & -1 & -2 & 1 & 1 \\ 0 & 0 & 0 & 1 & 0 & 0 & 0 & 0 & 0 & 1 & -1 & -1 \\ 0 & 0 & 0 & 0 & 1 & 0 & 0 & 0 & -1 & -1 & 0 & 0 \\ 0 & 0 & 0 & 0 & 0 & 1 & 0 & 0 & 0 & 0 & -1 & 0 \\ 0 & 0 & 0 & 0 & 0 & 0 & 1 & 0 & 0 & 0 & 0 & -1 \end{pmatrix}$$

$E_r$ 
 $Q$

The dual matroid  $\mathcal{M}_S^*$  is represented by the matrix  $C = (-Q^T \mid E_{n-r})$ , where  $B = (E_r \mid Q)$ . Thus

$$C = \begin{pmatrix} \boxed{1} & \boxed{2} & \boxed{3} & \boxed{5} & \boxed{6} & \boxed{9} & \boxed{11} & \boxed{4} & \boxed{7} & \boxed{8} & \boxed{10} & \boxed{12} \\ 1 & 1 & 1 & 0 & 0 & 0 & 0 & 1 & 0 & 0 & 0 & 0 \\ 1 & 1 & 1 & 0 & 1 & 0 & 0 & 0 & 1 & 0 & 0 & 0 \\ 1 & 1 & 2 & -1 & 1 & 0 & 0 & 0 & 0 & 1 & 0 & 0 \\ 0 & 0 & -1 & 1 & 0 & 1 & 0 & 0 & 0 & 0 & 1 & 0 \\ 0 & 0 & -1 & 1 & 0 & 0 & 1 & 0 & 0 & 0 & 0 & 1 \end{pmatrix}$$

$-Q^T$ 
 $E_{n-r}$

In order to contract  $\mathcal{M}_S$  on  $\text{Irr} = \mathfrak{R} \setminus \text{Rev}$  we delete  $\text{Rev} = \{3, 4, 5, 9, 10, 11, 12\}$  in  $\mathcal{M}_S^*$ , resp. the corresponding columns in  $C$ :

$$C' = \begin{pmatrix} \boxed{1} & \boxed{2} & \boxed{6} & \boxed{7} & \boxed{8} \\ 1 & 1 & 0 & 0 & 0 \\ 1 & 1 & 1 & 1 & 0 \\ 1 & 1 & 1 & 0 & 1 \\ 0 & 0 & 0 & 0 & 0 \\ 0 & 0 & 0 & 0 & 0 \end{pmatrix}$$

The matrix  $C'$  represents the matroid  $\mathcal{M}_S^* \setminus \text{Rev}$ . Since  $(\mathcal{M}_S^* \setminus \text{Rev})^* = (\mathcal{M}_S / \text{Rev})$ , we have to compute the dual of  $\mathcal{M}_S^* \setminus \text{Rev}$  in the same way

as we did for  $\mathcal{M}_S$ . We first compute the reduced row echelon form:

$$(C')^{\text{rref}} = \begin{pmatrix} \boxed{1} & \boxed{2} & \boxed{6} & \boxed{7} & \boxed{8} \\ 1 & 1 & 0 & 0 & 0 \\ 0 & 0 & 1 & 0 & 1 \\ 0 & 0 & 0 & 1 & -1 \end{pmatrix}$$

The last two rows are zero so we can omit them. The matrix  $Q$  consists of the columns corresponding to 2 and 8. Therefore the matrix representing the matroid  $\mathcal{M}_S/\text{Rev}$  is

$$D = \begin{pmatrix} \boxed{2} & \boxed{8} & \boxed{1} & \boxed{6} & \boxed{7} \\ -1 & 0 & 1 & 0 & 0 \\ 0 & -1 & 0 & 1 & -1 \end{pmatrix},$$

which after reordering of the columns is the matrix  $T$  in Example 3 of the main text.

For our computational experiments, we used the software toolbox SAGE (<http://www.sagemath.org>) for oriented matroids (The Sage Developers, 2016).

#### 4 Computing iMCSs as hitting sets

Given the set of MMBs of a network  $\mathcal{N}$ , computing the iMCSs of  $\mathcal{N}$  is a *hitting set problem*. In general, this has the following form: Given a set of elements  $\Omega$  and a family  $\Lambda$  of subsets  $D \subseteq \Omega$ , find (inclusion-)minimal subsets  $I \subseteq \Omega$  that contain at least one element in each set of  $\Lambda$ , i.e.,  $I \cap D \neq \emptyset$ , for all  $D \in \Lambda$ . In our case,  $\Omega = \text{Irr}$  and  $\Lambda = \text{MMBs}_{\text{tar}}$  is the family of MMBs involving the target reaction. We assume that there are no blocked reactions in the network, i.e., reactions which always have zero flux.

We solve the hitting set problem by mixed-integer linear programming. With every subset  $I \subseteq \text{Irr}$  we associate a vector  $x \in \{0, 1\}^{|\text{Irr}|}$  such that  $x_j = 1$  if reaction  $j \in I$ , and  $x_j = 0$  if reaction  $j \notin I$ . The mixed-integer linear program to enumerate iMCSs of minimum cardinality is

$$\begin{aligned} & \text{minimize } \sum_{j \in \text{Irr}} x_j \\ & \text{subject to } \sum_{j \in D} x_j \geq 1, \forall D \in \text{MMBs}_{\text{tar}}, \\ & x_j \in \{0, 1\}. \end{aligned}$$

Our goal is to enumerate all iMCSs and not only those of minimum cardinality. So whenever we find a new solution  $x^*$  at iteration  $i$ , we add a linear inequality to reject this solution at iteration  $i + 1$ . If  $x$  is a candidate solution at iteration  $i + 1$ , we require  $\text{supp}(x^*) \not\subseteq \text{supp}(x)$ , which can be formulated as  $\sum_{j \in \text{supp}(x^*)} x_j \leq |\text{supp}(x^*)| - 1$ .

#### 5 Proofs

**Proposition 1.** *Let  $\Gamma$  be a flux cone. If  $x \geq 0$  for all  $x \in \Gamma$ , then  $\Gamma$  is pointed and the extreme rays of  $\Gamma$  are exactly the rays in  $\Gamma$  of minimal support.*

**Proof.** In (Schuster and Hilgetag, 1994; Gagneur and Klamt, 2004), this result is proven for flux cones  $\Gamma = \Gamma_{\mathcal{N}}$  originating from a metabolic network  $\mathcal{N}$ . In this case, Prop. 1 states that in a metabolic network where all reactions are irreversible the extreme rays of  $\Gamma_{\mathcal{N}}$  are exactly the EFMs. The proof in (Schuster and Hilgetag, 1994; Gagneur and Klamt, 2004) directly carries over to the more general case of flux cones in the sense of Def. 2 of the main text for which  $I = \{1, \dots, n\}$ .  $\square$

**Theorem 1.** *Let  $\Gamma = \{x \in \mathbb{R}^n \mid Ax \geq 0\}$  be a flux cone with  $A = \begin{pmatrix} B \\ -B \\ E_{I,*} \end{pmatrix}$ . For any  $H \supseteq I$  the projection  $\text{proj}_H(\Gamma)$  is again a flux cone.*

**Proof.** For any  $k \in \{1, \dots, n\}$  the projection in direction of  $k$  on the set  $H_k = \{1, \dots, n\} \setminus \{k\}$  can be realised by Fourier-Motzkin elimination, see e.g. (Ziegler, 1995). Here a matrix  $A^{/k}$  is constructed such that  $\text{proj}_{H_k}(\Gamma) = \{x \in \mathbb{R}^n \mid A^{/k}x \geq 0, x_k = 0\}$ . The matrix  $A^{/k}$  contains the following rows:

- the rows  $A_{i,*}$  from  $A$ , for all  $i$  with  $a_{i,k} = 0$ .
- the rows  $a_{i,k}A_{j,*} + (-a_{j,k})A_{i,*}$ , for all  $i, j$  with  $a_{i,k} > 0, a_{j,k} < 0$ .

For the sake of convenience we divide the row indices of  $A$  into three sets:

$$J^0 = \{i \mid a_{i,k} = 0\}, \quad J^+ = \{i \mid a_{i,k} > 0\}, \quad J^- = \{i \mid a_{i,k} < 0\}.$$

If  $k \notin I$  then  $J^0$  will contain all rows corresponding to  $E_{I,*}$ .  $J^0$  can contain rows corresponding to  $B$  as well. Furthermore we have  $A_{J^+,*} = -A_{J^-,*}$  because  $A$  describes a flux cone. Following from this, the rows of

$$A^{/k} \text{ can be ordered such that } A^{/k} = \begin{pmatrix} C \\ -C \\ E_{I,*} \end{pmatrix} \text{ and therefore } \text{proj}_{H_k}(\Gamma)$$

is a flux cone as well. Repeating this construction for all  $k \notin H \supseteq I$ , we conclude that  $\text{proj}_H(\Gamma)$  is again a flux cone.  $\square$

**Theorem 2.** *Let  $\Gamma_{\mathcal{N}} = \{v \in \mathbb{R}^{|\mathfrak{R}|} \mid Sv = 0, v_{\text{Irr}} \geq 0\}$  be the flux cone of a metabolic network  $\mathcal{N} = (\mathfrak{M}, \mathfrak{R}, S, \text{Irr})$ . The supports of the extreme rays of the pointed cone  $\text{proj}_{\text{Irr}}(\Gamma_{\mathcal{N}})$  are exactly the minimal metabolic behaviours of the network  $\mathcal{N}$ .*

**Proof.** By Theorem 1 the cone  $\text{proj}_{\text{Irr}}(\Gamma_{\mathcal{N}})$  is a flux cone. Furthermore, we have  $v \geq 0$ , because  $v_{\text{Irr}} \geq 0$  and  $v_{\text{Rev}} = 0$ . Thus  $\text{proj}_{\text{Irr}}(\Gamma_{\mathcal{N}})$  is pointed and we may apply Prop. 1 to conclude that the extreme rays of  $\text{proj}_{\text{Irr}}(\Gamma_{\mathcal{N}})$  are the rays in  $\text{proj}_{\text{Irr}}(\Gamma_{\mathcal{N}})$  with minimal support. Since the supports of the rays in  $\text{proj}_{\text{Irr}}(\Gamma_{\mathcal{N}})$  are just the metabolic behaviors in  $\mathcal{N}$ , the result follows.  $\square$

**Theorem 3.** *The minimal metabolic behaviors of a metabolic network  $\mathcal{N} = (\mathfrak{M}, \mathfrak{R}, S, \text{Irr})$  with flux cone  $\Gamma_{\mathcal{N}}$  are exactly the oriented circuits  $X$  of the contraction  $\text{contr}_{\text{Irr}}(\mathcal{M}_S)$  for which  $X^- = \emptyset$ . If  $T \in \mathbb{R}^{k \times |\text{Irr}|}$  is a matrix representing  $\text{contr}_{\text{Irr}}(\mathcal{M}_S)$  then*

$$\text{proj}_{\text{Irr}}(\Gamma_{\mathcal{N}}) = \{v \in \mathbb{R}^{|\mathfrak{R}|} \mid Tv_{\text{Irr}} = 0, v_{\text{Irr}} \geq 0, v_{\text{Rev}} = 0\}.$$

**Proof.** Let  $\text{contr}_{\text{Irr}}(\mathcal{M}_S) = (\text{Irr}, C_{\text{Irr}})$  be the contraction of  $\mathcal{M}_S = (\mathfrak{R}, C)$  to  $\text{Irr}$ . Let  $C_{\text{Irr}}^{\text{pos}}$  be the family of circuits  $X \in C_{\text{Irr}}$  with  $X^- = \emptyset$ . Then

$$\begin{aligned} C_{\text{Irr}}^{\text{pos}} &= \text{Min}(\{Y|_{\text{Irr}} \mid Y \in C\}) \cap \{X \mid X^- = \emptyset\} \\ &= \text{Min}(\{Y|_{\text{Irr}} \mid Y \in C, Y^- \cap \text{Irr} = \emptyset\}) \\ &= \text{Min}(\{Y|_{\text{Irr}} \mid \\ &\quad Y \in \text{Min}(\{\sigma(v) \mid Sv = 0, v \in \mathbb{R}^{|\mathfrak{R}|}\}), Y^- \cap \text{Irr} = \emptyset\}) \\ &= \text{Min}(\{Y|_{\text{Irr}} \mid \\ &\quad Y \in \text{Min}(\{\sigma(v) \mid Sv = 0, v_{\text{Irr}} \geq 0, v \in \mathbb{R}^{|\mathfrak{R}|}\})\}) \\ &= \text{Min}(\{\sigma(v)|_{\text{Irr}} \mid Sv = 0, v_{\text{Irr}} \geq 0, v \in \mathbb{R}^{|\mathfrak{R}|}\}) \end{aligned}$$

The last set just defines the MMBs in  $\mathcal{N}$ .

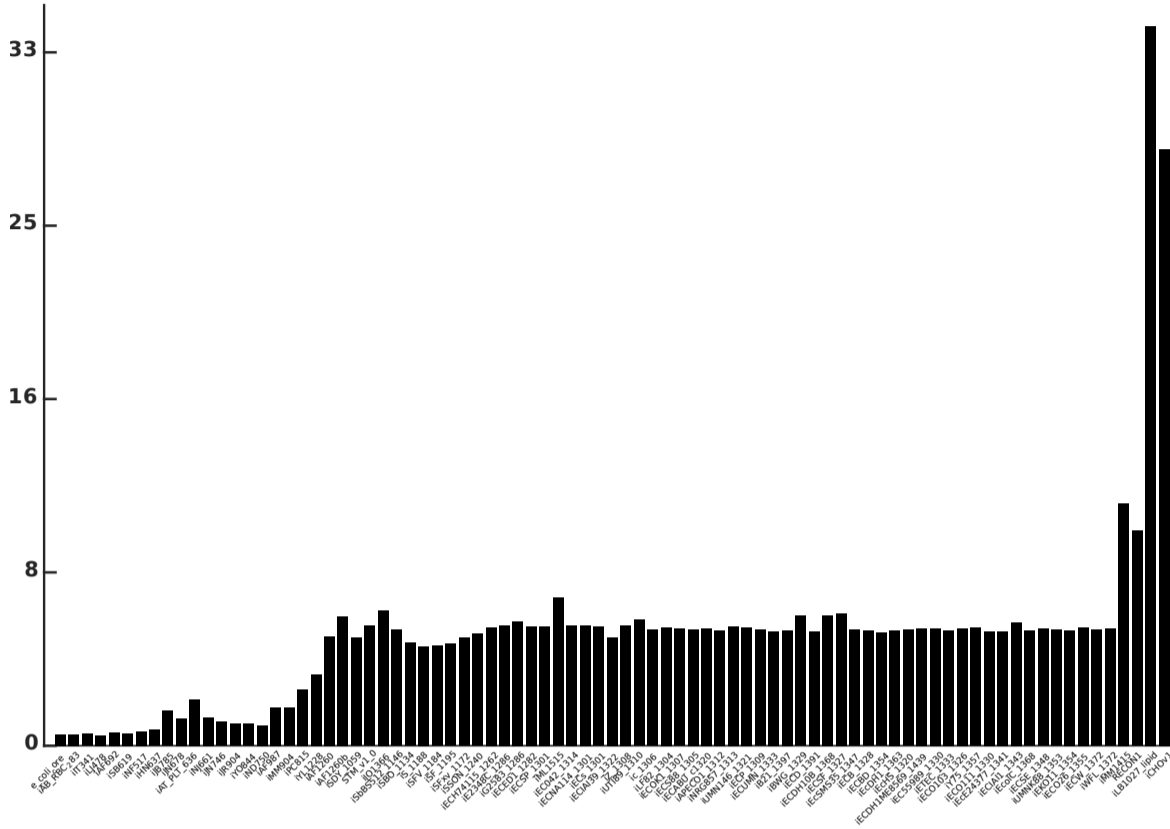

**Fig. 1.** The 84 networks from the BiGG Models Database ordered by the number of reactions. For each network, the bar indicates the time in minutes needed to compute the projected flux cone via contraction. For details, see Tab. 1-2.

If  $T$  represents  $\text{contr}_{\text{Irr}}(\mathcal{M}_S)$ , then  $\mathcal{C}_{\text{Irr}} = \text{Min}(\{\sigma(x) \mid Tx = 0, x \in \mathbb{R}^{|\text{Irr}|}\})$ . It follows that

$$\begin{aligned} \mathcal{C}_{\text{Irr}}^{\text{pos}} &= \text{Min}(\{\sigma(x) \mid Tx = 0, x \geq 0, x \in \mathbb{R}^{|\text{Irr}|}\}) \\ &= \text{Min}(\{\sigma(v)|_{\text{Irr}} \mid Sv = 0, v_{\text{Irr}} \geq 0, v \in \mathbb{R}^{|\mathcal{N}|}\}) \\ &= \text{Min}(\{\text{supp}(\text{proj}_{\text{Irr}}(v)) \mid v \in \Gamma_{\mathcal{N}}\}) \end{aligned}$$

Thus, in  $\mathbb{R}^{|\mathcal{N}|}$ , the two pointed cones  $\{v \in \mathbb{R}^{|\mathcal{N}|} \mid Tv_{\text{Irr}} = 0, v_{\text{Irr}} \geq 0, v_{\text{Rev}} = 0\}$  and  $\text{proj}_{\text{Irr}}(\Gamma_{\mathcal{N}})$  have the same set of minimal support vectors. By Prop. 1 they have the same set of extreme rays and therefore are identical.  $\square$

## 6 Results

All computations were done on a desktop computer with eight processors Intel(R) Core(TM) i7-2600, CPU 3.40GHZ, each with 2 threads.

### 6.1 Projection

We used the software SAGE (The Sage Developers, 2016) for computing the projection via contraction. We performed the projection on all 84 networks of the BiGG Models Database (King *et al.*, 2016), which took between 32 seconds (for a network of 87 unblocked reactions) and 35 minutes (for a network of 4047 unblocked reactions), see Fig. 1 and Tab. 1-2.

### 6.2 Computing iMCSs using MMBs

For computing the MMBs, we implemented our method in MATLAB. We used the software SAGE (The Sage Developers, 2016) for computing the projection via contraction and the software polco (<http://www.csb.ethz.ch/tools/software/polco.html>) (Terzer, 2009) for enumerating the extreme rays. Given the set of MMBs, computing iMCSs becomes a hitting set problem, see Sect. 4 or (Klamt, 2006).

To evaluate our method, we considered a selection of medium-sized metabolic networks from the BioModels Database (Li *et al.*, 2010). The number of *unblocked* reactions, i.e., reactions whose steady-state flux is not always zero, ranges from 87 up to 444. While EFMs could be computed for only one network, the set of MMBs could be obtained for all these networks in a relatively short amount of time, see Tab. 1 in the main document.

The number of MMBs ranges between 82 and 150132 and is not related to the number of irreversible reactions. For example, the network containing 41 irreversible reactions has more MMBs than the network containing 316 irreversible reactions. All networks contain a biomass reaction, which we used as target reaction to compute all iMCSs. The metabolic reconstruction *Rhizobium etli* iOR363 (Resendis-Antonio *et al.*, 2007; Li *et al.*, 2010) contains several biomass reactions, from which we used the *Wildtype Objective Function* with the id OF14e\_Retli.

The only network for which we were able to compute the whole set of EFMs is *Escherichia coli* MG1655. Here, the number of MMBs is by several orders of magnitude smaller than the number of EFMs, thus computing iMCSs is less time consuming. However, the more sets we have to hit, the more MCSs we obtain. The number of iMCSs is indeed

| network id     | size original cone | size projected cone | time |
|----------------|--------------------|---------------------|------|
| e_coli_core    | 68 × 87            | 16 × 40             | 32   |
| iAB_RBC_283    | 333 × 453          | 136 × 264           | 32   |
| iIT341         | 381 × 436          | 213 × 276           | 34   |
| iLJ478         | 331 × 385          | 171 × 228           | 30   |
| iAF692         | 417 × 484          | 245 × 321           | 39   |
| iSB619         | 381 × 450          | 192 × 275           | 35   |
| iNF517         | 435 × 513          | 203 × 296           | 42   |
| iHN637         | 448 × 524          | 266 × 351           | 46   |
| iJB785         | 671 × 741          | 440 × 543           | 100  |
| iJN678         | 597 × 675          | 405 × 497           | 79   |
| iAT_PLT_636    | 738 × 1008         | 316 × 559           | 134  |
| iNJ661         | 579 × 740          | 335 × 515           | 82   |
| iJN746         | 539 × 652          | 283 × 401           | 69   |
| iJR904         | 450 × 667          | 243 × 475           | 63   |
| iYO844         | 500 × 657          | 220 × 385           | 63   |
| iND750         | 479 × 631          | 210 × 381           | 59   |
| iAF987         | 708 × 840          | 429 × 574           | 111  |
| iMM904         | 650 × 893          | 307 × 586           | 109  |
| iPC815         | 761 × 1065         | 450 × 774           | 163  |
| iYL1228        | 830 × 1223         | 495 × 925           | 205  |
| iAF1260        | 1032 × 1532        | 661 × 1185          | 316  |
| iAF1260b       | 1040 × 1554        | 662 × 1200          | 373  |
| iSDY_1059      | 1026 × 1502        | 627 × 1133          | 311  |
| STM_v1_0       | 1086 × 1597        | 711 × 1249          | 346  |
| iJO1366        | 1155 × 1705        | 732 × 1312          | 391  |
| iSbBS512_1146  | 1018 × 1540        | 622 × 1169          | 334  |
| iSBO_1134      | 1022 × 1530        | 630 × 1168          | 297  |
| iS_1188        | 1017 × 1504        | 604 × 1127          | 286  |
| iSFV_1184      | 1026 × 1516        | 605 × 1136          | 288  |
| iSF_1195       | 1022 × 1512        | 601 × 1129          | 294  |
| iSF×v_1172     | 1045 × 1554        | 627 × 1171          | 311  |
| iSSON_1240     | 1066 × 1601        | 638 × 1206          | 323  |
| iECH74115_1262 | 1083 × 1636        | 658 × 1246          | 342  |
| iE2348C_1286   | 1087 × 1641        | 657 × 1243          | 347  |
| iG2583_1286    | 1087 × 1644        | 662 × 1254          | 358  |
| iECED1_1282    | 1087 × 1644        | 657 × 1249          | 344  |
| iECSP_1301     | 1087 × 1646        | 662 × 1256          | 344  |
| iML1515        | 1147 × 1744        | 719 × 1350          | 427  |
| iEC042_1314    | 1084 × 1644        | 662 × 1257          | 347  |
| iECNA114_1301  | 1091 × 1656        | 660 × 1260          | 348  |
| iECs_1301      | 1087 × 1646        | 662 × 1256          | 343  |

Table 1. Sizes of the flux cones and time for the projection for the first 42 networks (w.r.t. the number of reactions) of the BiGG Models Database (King et al., 2016). **network id**: The id of the network in the BiGG Models Database. **size original cone**: size of the flux cone of the original network: unblocked reactions and non-dead end metabolites. **size projected cone**: size of the projected flux cone of the original network: number of columns and rows of the matrix describing the projected flux cone. **time**: time in seconds needed to project onto the irreversible reactions (using the network without the blocked reactions).

smaller than the number of MCSs, and we are able to compute all of them in a short amount of time, see Tab. 1 in the main document. The time to compute iMCSs includes checking the results. For each iMCSs  $\zeta$  we ensure that removing all the reactions in  $\zeta$  from the network implies a zero flux through the target reaction. This checking step accounts for most of the running time.

The cardinalities of the iMCS we found are given in Fig. 2 and Tab. 3. Note that working with MMBs allows us to determine *all* iMCSs for the target reaction in the corresponding network.

| network id        | size original cone | size projected cone | time |
|-------------------|--------------------|---------------------|------|
| iECIAI39_1322     | 1044 × 1569        | 613 × 1177          | 313  |
| iZ_1308           | 1087 × 1646        | 662 × 1256          | 347  |
| iUT189_1310       | 1096 × 1662        | 660 × 1261          | 363  |
| ic_1306           | 1090 × 1656        | 654 × 1254          | 334  |
| iLF82_1304        | 1082 × 1650        | 645 × 1243          | 342  |
| iECOK1_1307       | 1096 × 1670        | 660 × 1269          | 337  |
| iECS88_1305       | 1088 × 1653        | 660 × 1260          | 335  |
| iECABU_c1320      | 1094 × 1663        | 659 × 1262          | 339  |
| iAPECO1_1312      | 1096 × 1668        | 660 × 1267          | 333  |
| iNRG857_1313      | 1100 × 1675        | 660 × 1268          | 344  |
| iUMN146_1321      | 1096 × 1670        | 660 × 1269          | 341  |
| iECP_1309         | 1094 × 1668        | 659 × 1267          | 334  |
| iECUMN_1333       | 1093 × 1657        | 655 × 1255          | 330  |
| iB21_1397         | 1089 × 1650        | 658 × 1253          | 332  |
| iBWG_1329         | 1164 × 1739        | 726 × 1335          | 375  |
| iECD_1391         | 1089 × 1650        | 658 × 1253          | 330  |
| iECDH10B_1368     | 1160 × 1736        | 721 × 1331          | 376  |
| iECSE_1327        | 1162 × 1743        | 726 × 1338          | 382  |
| iEcSMS35_1347     | 1102 × 1673        | 664 × 1271          | 334  |
| iECB_1328         | 1096 × 1660        | 662 × 1262          | 331  |
| iECBD_1354        | 1089 × 1651        | 658 × 1254          | 326  |
| iEcDH1_1363       | 1099 × 1667        | 663 × 1266          | 333  |
| iEcHS_1320        | 1094 × 1645        | 662 × 1251          | 334  |
| iECDH1ME8569_1439 | 1101 × 1670        | 663 × 1268          | 338  |
| iEC55989_1330     | 1103 × 1670        | 664 × 1268          | 339  |
| iETEC_1333        | 1095 × 1658        | 664 × 1263          | 332  |
| iECO103_1326      | 1096 × 1660        | 661 × 1262          | 338  |
| iY75_1357         | 1101 × 1670        | 663 × 1268          | 340  |
| iECO111_1330      | 1089 × 1651        | 660 × 1259          | 330  |
| iEcE24377_1341    | 1092 × 1655        | 663 × 1260          | 329  |
| iECIA1_1343       | 1089 × 1638        | 663 × 1251          | 356  |
| iEcoIC_1368       | 1092 × 1653        | 663 × 1261          | 331  |
| iECSE_1348        | 1098 × 1664        | 663 × 1266          | 337  |
| iUMNK88_1353      | 1098 × 1665        | 664 × 1268          | 334  |
| iEKO11_1354       | 1098 × 1655        | 663 × 1257          | 332  |
| iECO26_1355       | 1098 × 1666        | 663 × 1268          | 342  |
| iECW_1372         | 1102 × 1668        | 665 × 1269          | 334  |
| iWFL_1372         | 1102 × 1668        | 665 × 1269          | 337  |
| iMM1415           | 1665 × 2432        | 855 × 1576          | 700  |
| RECON1            | 1586 × 2467        | 525 × 1314          | 620  |
| iLB1027_lipid     | 1814 × 4047        | 1355 × 3653         | 2075 |
| iCHOv1            | 2213 × 4280        | 943 × 2527          | 1720 |

Table 2. Sizes of the flux cones and time for the projection for the second 42 networks (w.r.t. the number of reactions) in the BiGG Models Database (King et al., 2016). **network id**: The id of the network on the BiGG Models Database. **size original cone**: size of the flux cone of the original network: unblocked reactions and non-dead end metabolites. **size projected cone**: size of the projected flux cone of the original network: number of columns and rows of the matrix describing the projected flux cone. **time**: time in seconds needed to project onto the irreversible reactions (using the network without the blocked reactions).

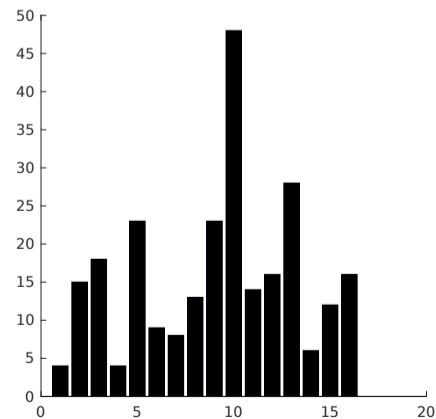

Fig. 2. Cardinality of iMCSs for *Escherichia coli* MG1655 (King et al., 2016). Each bar illustrates the number of iMCSs of the cardinality given on the x-axis. The number of iMCSs can be found on the y-axis.

| network                                                                        | rxns | irr | iMCSs | cardinality |     |    |    |    |   |    |    |    |    |    |    |    |    |    |    |
|--------------------------------------------------------------------------------|------|-----|-------|-------------|-----|----|----|----|---|----|----|----|----|----|----|----|----|----|----|
|                                                                                |      |     |       | 1           | 2   | 3  | 4  | 5  | 6 | 7  | 8  | 9  | 10 | 11 | 12 | 13 | 14 | 15 | 16 |
| <i>Escherichia coli</i> MG1655 (Orth <i>et al.</i> , 2010)                     | 87   | 41  | 257   | 4           | 15  | 17 | 4  | 23 | 9 | 8  | 13 | 23 | 48 | 13 | 16 | 29 | 6  | 13 | 16 |
| <i>Rhizobium etli</i> iOR363 (Resendis-Antonio <i>et al.</i> , 2007)           | 194  | 104 | 60    | 29          | 18  | 13 | 0  | 0  | 0 | 0  | 0  | 0  | 0  | 0  | 0  | 0  | 0  | 0  | 0  |
| <i>Buchnera</i> iSM197 (MacDonald <i>et al.</i> , 2011)                        | 244  | 170 | 200   | 165         | 18  | 11 | 6  | 0  | 0 | 0  | 0  | 0  | 0  | 0  | 0  | 0  | 0  | 0  | 0  |
| <i>Blattabacterium cuenoti</i> iCG238 (González-Domenech <i>et al.</i> , 2012) | 308  | 197 | 184   | 165         | 6   | 9  | 4  | 0  | 0 | 0  | 0  | 0  | 0  | 0  | 0  | 0  | 0  | 0  | 0  |
| <i>Blattabacterium</i> iCG230 (González-Domenech <i>et al.</i> , 2012)         | 400  | 192 | 159   | 152         | 7   | 0  | 0  | 0  | 0 | 0  | 0  | 0  | 0  | 0  | 0  | 0  | 0  | 0  | 0  |
| <i>Mycobacterium tuberculosis</i> iNJ661 (Jamshidi and Palsson, 2007)          | 427  | 296 | 381   | 233         | 102 | 20 | 26 | 0  | 0 | 0  | 0  | 0  | 0  | 0  | 0  | 0  | 0  | 0  | 0  |
| <i>Salmonella Typhimurium</i> STM_v1_0 (Thiele <i>et al.</i> , 2011)           | 458  | 316 | 321   | 296         | 19  | 6  | 0  | 0  | 0 | 0  | 0  | 0  | 0  | 0  | 0  | 0  | 0  | 0  | 0  |
| <i>Helicobacter pylori</i> iCS291 (Schilling <i>et al.</i> , 2002)             | 444  | 271 | 187   | 95          | 37  | 14 | 19 | 2  | 7 | 13 | 0  | 0  | 0  | 0  | 0  | 0  | 0  | 0  | 0  |

Table 3. Cardinality of iMCSs for selected networks (with given target reaction). The description of *Escherichia coli* MG1655 (Orth *et al.*, 2010) was taken from the BiGG Models Database (King *et al.*, 2016), while the remaining ones come from the BioModels Database (Li *et al.*, 2010). **network**: name of the metabolic network. **rxns**: number of unblocked reactions. **irr**: number of unblocked irreversible reactions. **iMCS**: number of irreversible minimal cut sets. **cardinality**: number of all existing iMCSs of the corresponding cardinality.

### 6.3 Computing iMCSs using the dual approach

#### 6.3.1 Computing iMCSs with CellNetAnalyzer

In the following, we present results for computing a given number of iMCSs using the toolbox CellNetAnalyzer (von Kamp *et al.*, 2017), version 2018.1, together with CPLEX 12.8 (<http://www.cplex.com>). We computed iMCSs using the original and the projected flux cone for all networks from the BiGG Models Database (King *et al.*, 2016) that include a biomass reaction (which was the target reaction). When searching for MCSs in the original flux cone, we only allowed irreversible reactions to be included in the computed MCSs. Thus, we computed iMCSs also in the original flux cone.

The results are summarised graphically in Fig. 4 of the main document. Tab. 4 to 7 provide the full information. In each experiment, we specify a number of iMCSs to be computed. In general, CellNetAnalyzer computes slightly more than the requested number due to internal algorithmic reasons. An entry ‘OoM’ indicates that CellNetAnalyzer ran out of memory. Note that for various larger genome-scale metabolic networks, it was not possible to compute any iMCSs using the original cone, while in all these cases we were able to compute 40 or more iMCSs using the projected cone. For all networks considered here with the exception of e\_coli\_core, we were only able to compute iMCSs of cardinality 1.

| network id  | pre-nr | nr original | nr projected | time original | time projected | relative time |
|-------------|--------|-------------|--------------|---------------|----------------|---------------|
| e_coli_core | 10     | 15          | 18           | 1             | 0.41           | 2.44          |
|             | 20     | 33          | 33           | 2.72          | 0.84           | 3.24          |
|             | 50     | 57          | 55           | 1.21          | 0.61           | 1.98          |
|             | 100    | 110         | 111          | 2.17          | 5              | 0.43          |
| iT341       | 10     | 15          | 10           | 5.49          | 2.33           | 2.36          |
|             | 20     | 24          | 40           | 6.39          | 2.51           | 2.55          |
|             | 50     | 58          | 54           | 5.32          | 2.42           | 2.20          |
| iLJ478      | 10     | 10          | 11           | 4.4           | 1.88           | 2.34          |
|             | 20     | 21          | 20           | 3.96          | 1.87           | 2.12          |
|             | 50     | 51          | 50           | 4.12          | 1.81           | 2.28          |
| iAF692      | 10     | 11          | 11           | 5.69          | 2.73           | 2.08          |
|             | 20     | 22          | 20           | 6.01          | 2.73           | 2.20          |
|             | 50     | 51          | 58           | 6             | 2.98           | 2.01          |
| iSB619      | 10     | 10          | 12           | 5.06          | 2.24           | 2.26          |
|             | 20     | 21          | 23           | 4.94          | 2.23           | 2.22          |
|             | 50     | 51          | 62           | 5.25          | 2.38           | 2.21          |
| iNF517      | 10     | 10          | 11           | 5.82          | 2.48           | 2.35          |
|             | 20     | 20          | 22           | 5.78          | 2.44           | 2.37          |
|             | 50     | 51          | 58           | 6.17          | 2.65           | 2.33          |
| iHN637      | 10     | 12          | 12           | 6.24          | 3.05           | 2.05          |
|             | 20     | 22          | 22           | 6.24          | 3.03           | 2.06          |
|             | 50     | 58          | 57           | 6.51          | 3.27           | 1.99          |
| iJB785      | 50     | 50          | 59           | 18.34         | 7.38           | 2.49          |
| iJN678      | 10     | 11          | 26           | 9.5           | 6.46           | 1.47          |
|             | 20     | 23          | 29           | 14.8          | 5.96           | 2.48          |
|             | 50     | 54          | 67           | 12.19         | 5.85           | 2.08          |
| iNJ661      | 10     | 12          | 11           | 16.44         | 6.25           | 2.63          |
|             | 20     | 20          | 21           | 13.35         | 6.11           | 2.18          |
|             | 50     | 50          | 50           | 14.19         | 6.73           | 2.11          |
| iJN746      | 100    | 101         | 101          | 16.49         | 7.17           | 2.30          |
|             | 10     | 13          | 12           | 9.33          | 3.77           | 2.47          |
|             | 20     | 21          | 21           | 9.69          | 3.83           | 2.53          |
| iJR904      | 50     | 51          | 50           | 9.78          | 4.14           | 2.36          |
|             | 100    | 102         | 100          | 10.33         | 4.12           | 2.51          |
|             | 10     | 10          | 10           | 10.23         | 5.66           | 1.81          |
|             | 20     | 20          | 20           | 10.77         | 5.92           | 1.82          |
|             | 50     | 65          | 51           | 11.5          | 6.35           | 1.81          |
|             | 100    | 124         | 108          | 10.85         | 6.59           | 1.65          |

Table 4. **network id**: id of the network in the BiGG Models Database. **pre-nr**: requested number of iMCSs. **nr original**: number of iMCSs computed using the original cone, in general at least as many as requested. **nr projected**: number of iMCSs computed using the projected cone, in general at least as many as requested. **time original**: time (in seconds) needed to compute the given number of iMCSs in the original cone. **time projected**: time (in seconds) needed to compute the given number of iMCSs in the projected cone. **relative time**: relative time needed to compute the given number of iMCSs in the original cone compared to the time needed using the projected cone.

6

| network id    | pre-nr | nr original | nr projected | time original | time projected | relative time | network id     | pre-nr | nr original | nr projected | time original | time projected | relative time |
|---------------|--------|-------------|--------------|---------------|----------------|---------------|----------------|--------|-------------|--------------|---------------|----------------|---------------|
| iYO844        | 10     | 12          | 11           | 9.5           | 3.56           | 2.67          | iSF_1195       | 10     | 14          | 11           | 67.07         | 31.88          | 2.10          |
|               | 20     | 20          | 20           | 10.09         | 3.78           | 2.67          |                | 20     | 25          | 23           | 74.14         | 34.62          | 2.14          |
|               | 50     | 53          | 50           | 10.68         | 4.05           | 2.64          |                | 40     | 49          | 49           | 74.91         | 39.09          | 1.92          |
|               | 100    | 106         | 100          | 10.34         | 4.19           | 2.47          |                | 100    | 114         | 110          | 72.69         | 37.71          | 1.93          |
| iND750        | 10     | 13          | 10           | 9.11          | 3.57           | 2.55          | iSFxv_1172     | 10     | 10          | 11           | 72.9          | 35.04          | 2.08          |
|               | 20     | 25          | 21           | 9.12          | 3.7            | 2.46          |                | 20     | 20          | 26           | 83.11         | 38.48          | 2.16          |
|               | 50     | 53          | 50           | 9.97          | 3.9            | 2.56          |                | 40     | 40          | 53           | 85.95         | 41.18          | 2.09          |
|               | 100    | 106         | 100          | 9.67          | 3.72           | 2.60          |                | 100    | 100         | 117          | 86.48         | 41.7           | 2.07          |
| iAF987        | 10     | 10          | 10           | 15.96         | 6.89           | 2.32          | iSSON_1240     | 10     | 11          | 12           | 35.16         | 37.92          | 0.93          |
|               | 20     | 23          | 25           | 16.93         | 7.23           | 2.34          |                | 40     | 41          | 48           | 88.32         | 44.9           | 1.97          |
|               | 50     | 60          | 68           | 20.58         | 7.31           | 2.82          |                | 100    | 100         | 131          | 87.88         | 44.96          | 1.95          |
|               | 100    | 110         | 119          | 16.89         | 7.14           | 2.37          | iECH74115_1262 | 10     | 12          | 13           | 37.92         | 40.75          | 0.93          |
| iMM904        | 10     | 12          | 10           | 19.44         | 7.7            | 2.52          |                | 40     | 40          | 46           | 94.19         | 49.24          | 1.91          |
|               | 20     | 22          | 20           | 20.16         | 8.23           | 2.45          |                | 100    | 117         | 124          | 93.73         | 49.09          | 1.91          |
|               | 50     | 51          | 50           | 26.59         | 8.91           | 2.98          | iE2348C_1286   | 10     | 13          | 15           | 40.75         | 42.37          | 0.96          |
|               | 100    | 101         | 102          | 19.84         | 10.85          | 1.83          |                | 40     | 44          | 42           | 96.23         | 48.67          | 1.98          |
| iPC815        | 10     | 11          | 10           | 28.61         | 13.22          | 2.16          |                | 100    | 119         | 107          | 95.93         | 50             | 1.92          |
|               | 20     | 20          | 20           | 30.13         | 13.94          | 2.16          | iG2583_1286    | 10     | 15          | 11           | 42.37         | 44.86          | 0.94          |
|               | 100    | 100         | 101          | 29.24         | 14.08          | 2.08          |                | 40     | 47          | 48           | 96.97         | 49.66          | 1.95          |
| iYL1228       | 10     | 10          | 10           | 40.66         | 20.24          | 2.01          |                | 100    | 115         | 112          | 93.78         | 50.25          | 1.87          |
|               | 20     | 20          | 20           | 42.29         | 20.95          | 2.02          | iECED1_1282    | 10     | 14          | 13           | 106.35        | 47.94          | 2.22          |
|               | 100    | 102         | 100          | 42.47         | 20.54          | 2.07          |                | 40     | 44          | 47           | 96.1          | 49.48          | 1.94          |
| iAF1260       | 10     | 10          | 10           | 67.14         | 37.18          | 1.81          |                | 100    | 111         | 121          | 93.55         | 49.71          | 1.88          |
|               | 20     | 20          | 20           | 76.99         | 40.11          | 1.92          | iECSP_1301     | 10     | 10          | 15           | 90.99         | 46.51          | 1.96          |
|               | 100    | 101         | 101          | 68.32         | 42.66          | 1.60          |                | 40     | OoM         | 49           | OoM           | 50.35          | NAN           |
| iAF1260b      | 10     | 10          | 10           | 69.72         | 37.52          | 1.86          | iML1515        | 10     | 10          | 11           | 123.43        | 57.22          | 2.16          |
|               | 20     | 20          | 20           | 80.36         | 41.85          | 1.92          |                | 40     | OoM         | 40           | OoM           | 62.58          | NAN           |
|               | 40     | 40          | 40           | 93.02         | 53.18          | 1.75          | iEC042_1314    | 10     | 13          | 14           | 92.84         | 46.44          | 2.00          |
|               | 100    | 101         | 102          | 71            | 55.26          | 1.28          |                | 40     | OoM         | 53           | OoM           | 49.77          | NAN           |
| iSDY_1059     | 10     | 10          | 10           | 65.95         | 31.78          | 2.08          | iECNA114_1301  | 10     | 10          | 14           | 107.49        | 46.62          | 2.31          |
|               | 20     | 20          | 27           | 70.23         | 34.95          | 2.01          |                | 40     | OoM         | 58           | OoM           | 53.38          | NAN           |
|               | 40     | 40          | 41           | 75.56         | 37.68          | 2.01          | iECs_1301      | 10     | 10          | 11           | 98.75         | 45.64          | 2.16          |
|               | 100    | 100         | 122          | 67.22         | 37.74          | 1.78          |                | 40     | OoM         | 50           | OoM           | 49.77          | NAN           |
| STM_v1_0      | 10     | 10          | 11           | 77.27         | 41.58          | 1.86          | iECIAI39_1322  | 10     | 10          | 10           | 80.24         | 38.11          | 2.11          |
|               | 20     | 20          | 20           | 83.27         | 44.78          | 1.86          |                | 40     | OoM         | 40           | OoM           | 41.16          | NAN           |
|               | 40     | 40          | 41           | 89.25         | 50.11          | 1.78          | iZ_1308        | 10     | 11          | 11           | 91.73         | 45.8           | 2.00          |
|               | 100    | 101         | 100          | 78.29         | 49.96          | 1.57          |                | 40     | OoM         | 50           | OoM           | 51.05          | NAN           |
| iJO1366       | 10     | 10          | 10           | 94.75         | 46.35          | 2.04          | iUTI89_1310    | 10     | 10          | 11           | 95.72         | 46.7           | 2.05          |
|               | 20     | 21          | 23           | 100.32        | 50.66          | 1.98          |                | 40     | OoM         | 51           | OoM           | 50.95          | NAN           |
|               | 40     | 43          | 50           | 113.93        | 56.41          | 2.02          | ic_1306        | 10     | 17          | 12           | 94.22         | 45.91          | 2.05          |
|               | 100    | 111         | 107          | 117.53        | 56.1           | 2.10          |                | 40     | OoM         | 57           | OoM           | 50.32          | NAN           |
| iSbBS512_1146 | 10     | 11          | 11           | 67.98         | 34.65          | 1.96          | iLF82_1304     | 10     | 12          | 12           | 91.54         | 44.84          | 2.04          |
|               | 20     | 20          | 23           | 73.41         | 37.34          | 1.97          |                | 40     | OoM         | 46           | OoM           | 48.61          | NAN           |
|               | 40     | 44          | 50           | 80.56         | 41.55          | 1.94          | iECOK1_1307    | 10     | 12          | 12           | 104.78        | 47.24          | 2.21          |
|               | 100    | 135         | 121          | 77.1          | 40.84          | 1.89          |                | 40     | OoM         | 54           | OoM           | 52.17          | NAN           |
| iSBO_1134     | 10     | 13          | 10           | 69.24         | 34.38          | 2.01          | iECS88_1305    | 10     | 10          | 11           | 97.17         | 46.42          | 2.1           |
|               | 20     | 22          | 26           | 76.12         | 37.71          | 2.02          |                | 40     | OoM         | 43           | OoM           | 50.67          | NAN           |
|               | 40     | 48          | 49           | 77.71         | 41.09          | 1.89          | iECABU_c1320   | 10     | 12          | 15           | 95.62         | 47.45          | 2             |
|               | 100    | 132         | 119          | 78.95         | 41.11          | 1.92          |                | 40     | OoM         | 48           | OoM           | 51.2           | NAN           |
| iS_1188       | 10     | 12          | 12           | 65.28         | 31.63          | 2.06          | iAPECO1_1312   | 10     | 10          | 13           | 105.84        | 48.67          | 2.17          |
|               | 20     | 20          | 26           | 70.15         | 34.48          | 2.03          |                | 40     | OoM         | 50           | OoM           | 51.73          | NAN           |
|               | 40     | 40          | 53           | 75.28         | 38.45          | 1.96          | iNRG857_1313   | 10     | 11          | 10           | 95.62         | 49.63          | 1.92          |
|               | 100    | 124         | 109          | 79.25         | 37.66          | 2.10          |                | 40     | OoM         | 49           | OoM           | 52.09          | NAN           |
| iSFV_1184     | 10     | 11          | 12           | 67.54         | 32.62          | 2.07          | iUMN146_1321   | 10     | 10          | 12           | 95.71         | 48.03          | 1.99          |
|               | 20     | 20          | 26           | 73.33         | 35.72          | 2.05          |                | 40     | OoM         | 48           | OoM           | 51.76          | NAN           |
|               | 40     | 40          | 52           | 75.5          | 38.4           | 1.97          |                |        |             |              |               |                |               |
|               | 100    | 133         | 116          | 74.25         | 38.82          | 1.91          |                |        |             |              |               |                |               |

Table 5. **network id**: id of the network in the BiGG Models Database. **pre-nr**: requested number of iMCSs. **nr original**: number of iMCSs computed using the original cone, in general at least as many as requested. **nr projected**: number of iMCSs computed using the projected cone, in general at least as many as requested. **time original**: time (in seconds) needed to compute the given number of iMCSs in the original cone. **time projected**: time (in seconds) needed to compute the given number of iMCSs in the projected cone. **relative time**: relative time needed to compute the given number of iMCSs in the original cone compared to the time needed using the projected cone.

Table 6. **network id**: id of the network in the BiGG Models Database. **pre-nr**: requested number of iMCSs. **nr original**: number of iMCSs computed using the original cone, in general at least as many as requested. **nr projected**: number of iMCSs computed using the projected cone, in general at least as many as requested. **time original**: time (in seconds) needed to compute the given number of iMCSs in the original cone. **time projected**: time (in seconds) needed to compute the given number of iMCSs in the projected cone. **relative time**: relative time needed to compute the given number of iMCSs in the original cone compared to the time needed using the projected cone. **OoM**: the program ran out of memory when trying to compute the requested number of iMCSs.

| network id        | pre-nr | nr original | nr proj | time original | time proj | relative time |
|-------------------|--------|-------------|---------|---------------|-----------|---------------|
| iECP_1309         | 10     | 10          | 12      | 96.49         | 44.98     | 2.14          |
|                   | 40     | OoM         | 42      | OoM           | 51.56     | NAN           |
| iECUMN_1333       | 10     | 11          | 13      | 93.48         | 46.15     | 2.02          |
|                   | 40     | OoM         | 59      | OoM           | 50.72     | NAN           |
| iB21_1397         | 10     | 15          | 11      | 89.75         | 45.78     | 1.96          |
|                   | 40     | OoM         | 56      | OoM           | 50.41     | NAN           |
| iBWG_1329         | 10     | 15          | 14      | 107.72        | 54.65     | 1.97          |
|                   | 40     | OoM         | 50      | OoM           | 59.04     | NAN           |
| iECD_1391         | 10     | 12          | 11      | 91.91         | 45.42     | 2.02          |
|                   | 40     | OoM         | 56      | OoM           | 50.21     | NAN           |
| iECDH10B_1368     | 10     | OoM         | 10      | OoM           | 52.37     | NAN           |
|                   | 40     | OoM         | 40      | OoM           | 57.45     | NAN           |
| iECSE_1327        | 10     | OoM         | 10      | OoM           | 54.19     | NAN           |
|                   | 40     | OoM         | 50      | OoM           | 60.3      | NAN           |
| iEcSMS35_1347     | 10     | OoM         | 14      | OoM           | 47.29     | NAN           |
|                   | 40     | OoM         | 45      | OoM           | 52.41     | NAN           |
| iECB_1328         | 10     | OoM         | 12      | OoM           | 45.67     | NAN           |
|                   | 40     | OoM         | 46      | OoM           | 51.34     | NAN           |
| iECBD_1354        | 10     | OoM         | 18      | OoM           | 45.8      | NAN           |
|                   | 40     | OoM         | 43      | OoM           | 50.61     | NAN           |
| iEcDH1_1363       | 10     | OoM         | 13      | OoM           | 46.45     | NAN           |
|                   | 40     | OoM         | 42      | OoM           | 50.85     | NAN           |
| iEcHS_1320        | 10     | OoM         | 10      | OoM           | 45.07     | NAN           |
|                   | 40     | OoM         | 47      | OoM           | 49.7      | NAN           |
| iECDH1ME8569_1439 | 10     | OoM         | 10      | OoM           | 46.58     | NAN           |
|                   | 40     | OoM         | 62      | OoM           | 51.66     | NAN           |
| iEC55989_1330     | 10     | OoM         | 11      | OoM           | 46.46     | NAN           |
|                   | 40     | OoM         | 49      | OoM           | 51.13     | NAN           |
| iETEC_1333        | 10     | OoM         | 11      | OoM           | 46.44     | NAN           |
|                   | 40     | OoM         | 51      | OoM           | 51.12     | NAN           |
| iECO103_1326      | 10     | OoM         | 11      | OoM           | 46.74     | NAN           |
|                   | 40     | OoM         | 47      | OoM           | 51.71     | NAN           |
| iY75_1357         | 10     | OoM         | 10      | OoM           | 46.52     | NAN           |
|                   | 40     | OoM         | 41      | OoM           | 51.36     | NAN           |
| iECO111_1330      | 10     | OoM         | 10      | OoM           | 45.79     | NAN           |
|                   | 40     | OoM         | 41      | OoM           | 49.8      | NAN           |
| iEcE24377_1341    | 10     | OoM         | 12      | OoM           | 48.58     | NAN           |
|                   | 40     | OoM         | 50      | OoM           | 51.26     | NAN           |
| iECIA1_1343       | 10     | OoM         | 12      | OoM           | 43.6      | NAN           |
|                   | 40     | OoM         | 45      | OoM           | 49.03     | NAN           |
| iEcoIC_1368       | 10     | OoM         | 14      | OoM           | 46.61     | NAN           |
|                   | 40     | OoM         | 52      | OoM           | 52.28     | NAN           |
| iECSE_1348        | 10     | OoM         | 10      | OoM           | 47.44     | NAN           |
|                   | 40     | OoM         | 44      | OoM           | 51.96     | NAN           |
| iUMNK88_1353      | 10     | OoM         | 10      | OoM           | 47.77     | NAN           |
|                   | 40     | OoM         | 57      | OoM           | 52.19     | NAN           |
| iEKO11_1354       | 10     | OoM         | 10      | OoM           | 46.1      | NAN           |
|                   | 40     | OoM         | 51      | OoM           | 53.27     | NAN           |
| iECO26_1355       | 10     | OoM         | 10      | OoM           | 46.9      | NAN           |
|                   | 40     | OoM         | 48      | OoM           | 53.48     | NAN           |
| iECW_1372         | 10     | OoM         | 12      | OoM           | 47.4      | NAN           |
|                   | 40     | OoM         | 47      | OoM           | 53.49     | NAN           |
| iWFL_1372         | 10     | OoM         | 12      | OoM           | 47.38     | NAN           |
|                   | 40     | OoM         | 47      | OoM           | 53.69     | NAN           |
| iWFL_1372         | 10     | OoM         | 10      | OoM           | 84.81     | NAN           |

Table 7. **network id**: id of the network in the BiGG Models Database. **pre-nr**: requested number of iMCSs. **nr original**: number of iMCSs computed using the original cone, in general at least as many as requested. **nr proj**: number of iMCSs computed using the projected cone, in general at least as many as requested. **time original**: time (in seconds) needed to compute the given number of iMCSs in the original cone. **time proj**: time (in seconds) needed to compute the given number of iMCSs in the projected cone. **OoM**: the program ran out of memory trying to compute the requested number of iMCSs.

### 6.3.2 Computing iMCSs including a knock-out reaction

We applied the software of (Tobalina *et al.*, 2016) together with CPLEX 12.4 (<http://www.cplex.com>) to the original stoichiometric matrices and to the matrices after the projection was performed. Then we compared the results. Again the networks originate from the BiGG Models Database (King *et al.*, 2016). Following (Tobalina *et al.*, 2016), we used as target reaction the biomass reaction and looped over all irreversible reactions. For each irreversible reaction  $i$  we set a time limit of 1 minute and tried to compute an iMCS using the biomass reaction as a target reaction and  $i$  as a knock-out reaction. The computation for  $i$  stopped if such an iMCS was found or after the timeout of 1 minute. Finally, we compared the number of iMCSs computed using this approach. Except for one network, we always computed more iMCSs in the projected flux cone than in the original cone, see Tab. 8, and Fig. 5 in the main article.

| network id        | Nr. original | Nr. projected | difference |
|-------------------|--------------|---------------|------------|
| iG2583_1286       | 847          | 1133          | 286        |
| iECED1_1282       | 845          | 994           | 149        |
| iECSP_1301        | 868          | 996           | 128        |
| iML1515           | 877          | 1350          | 473        |
| iECNA114_1301     | 862          | 1135          | 273        |
| iECs_1301         | 866          | 1007          | 141        |
| iZ_1308           | 841          | 1008          | 167        |
| iUTI89_1310       | 841          | 1032          | 191        |
| ic_1306           | 896          | 1055          | 159        |
| iLF82_1304        | 836          | 1088          | 252        |
| iECOK1_1307       | 861          | 1106          | 245        |
| iECS88_1305       | 835          | 1055          | 220        |
| iECABU_c1320      | 855          | 1090          | 235        |
| iAPECO1_1312      | 845          | 1121          | 276        |
| iUMN146_1321      | 831          | 1037          | 206        |
| iBWG_1329         | 937          | 1226          | 289        |
| iECD_1391         | 833          | 1135          | 302        |
| iECDH10B_1368     | 924          | 1231          | 307        |
| iECSE_1327        | 959          | 1277          | 318        |
| iECSMS35_1347     | 851          | 1066          | 215        |
| iECB_1328         | 871          | 1183          | 312        |
| iECBD_1354        | 824          | 1078          | 254        |
| iEcDH1_1363       | 819          | 1148          | 329        |
| iEcHS_1320        | 854          | 1150          | 296        |
| iECDH1ME8569_1439 | 836          | 1065          | 229        |
| iEC55989_1330     | 858          | 1080          | 222        |
| iETEC_1333        | 844          | 1061          | 217        |
| iECO103_1326      | 846          | 1108          | 262        |
| iY75_1357         | 826          | 1074          | 248        |
| iECO111_1330      | 879          | 1042          | 163        |
| iEcE24377_1341    | 863          | 1101          | 238        |
| iECIA11_1343      | 854          | 666           | -188       |
| iEcoIC_1368       | 832          | 1117          | 285        |
| iECSE_1348        | 865          | 1018          | 153        |
| iUMNK88_1353      | 830          | 1023          | 193        |
| iEKO11_1354       | 835          | 1162          | 327        |
| iECO26_1355       | 842          | 1129          | 287        |
| iWFL_1372         | 840          | 1179          | 339        |
| iLB1027_lipid     | 546          | 2916          | 2370       |

Table 8. We applied the program of (Tobalina et al., 2016) to the original stoichiometric matrices and to the matrices after the projection was performed. As a target reaction we had for all cases the biomass reaction. We looped over all irreversible reactions and compute an iMCS. After one minute, or after an iMCS was found, the next step started with a new knock-out reaction. **network id**: the id of the network as it can be found in the BiGG Models Database. **Nr. original**: the number of iMCSs which were found using the original flux cone. **Nr. projected**: the number of iMCSs which were found using the projected flux cone. **difference**: the number of iMCSs we found more when using the projected flux cone instead the original.

## 7 Impact of the ratio between reversible and irreversible reactions on the performance of the projection

To study the impact of the ratio between reversible and irreversible reactions on the projection, we did the following additional experiments using the *ecoli\_core* network. We first performed the projection on the irreversible reactions using the original network. Then we set the first reversible reaction to irreversible (which also makes some other reactions irreversible) and performed the projection on the new network  $N_1$ . In the following step, we set the first reversible reaction of the network  $N_1$  to irreversible and performed the projection. We repeated this procedure until no reaction in the network was reversible anymore. We compared the sizes

of the projected flux cones and the computation time. The results are given in Tab. 9. Contrary to what might be expected, the time for the projection seems to increase with the number of irreversible reactions (except for the trivial case where all reactions are irreversible). We believe that in general it is not clear what impact the ratio of irreversible to reversible reactions will have on the computation time for the projection.

| network name                      | size normal    | size projected | time |
|-----------------------------------|----------------|----------------|------|
| e_coli_core_projected             | $68 \times 87$ | $16 \times 40$ | 32   |
| ecoli_core_Irrev_step_1_projected | $68 \times 87$ | $49 \times 73$ | 32   |
| ecoli_core_Irrev_step_2_projected | $68 \times 87$ | $53 \times 77$ | 34   |
| ecoli_core_Irrev_step_3_projected | $68 \times 87$ | $55 \times 79$ | 30   |
| ecoli_core_Irrev_step_4_projected | $68 \times 87$ | $57 \times 81$ | 39   |
| ecoli_core_Irrev_step_5_projected | $68 \times 87$ | $58 \times 82$ | 35   |
| ecoli_core_Irrev_step_6_projected | $68 \times 87$ | $59 \times 83$ | 42   |
| ecoli_core_Irrev_step_7_projected | $68 \times 87$ | $62 \times 86$ | 46   |
| ecoli_core_Irrev_step_8_projected | $68 \times 87$ | $63 \times 87$ | 53   |
| ecoli_core_Irrev_step_9_projected | $68 \times 87$ | $68 \times 87$ | 0    |

Table 9. Given the *e\_coli\_core* network, we set step-by-step one reversible reaction to irreversible and perform the projection on the new set of irreversible reactions. Each row corresponds to one step: in the first row the projection was applied to the original flux cone. In the second row, the projection was performed on the network after setting one reversible reaction to irreversible, etc. **network name**: the name of the network and the step resp. number of reversible reactions set to irreversible. **size normal** is the size of the original flux cone (number of metabolites times the number of reactions). **size projected** gives the size of the cone after the projection was performed and **time** gives the time in seconds, needed to perform the projection.

## References

- Björner, A., Las Vergnas, M., Sturmfels, B., White, N., and Ziegler, G. M. (1999). *Oriented matroids*, volume 2. Cambridge University Press.
- Gagneur, J. and Klamt, S. (2004). Computation of elementary modes: a unifying framework and the new binary approach. *BMC Bioinformatics*, 5(175).
- González-Domenech, C. M., Belda, E., Patiño-Navarrete, R., Moya, A., Peretó, J., and Latorre, A. (2012). Metabolic stasis in an ancient symbiosis: genome-scale metabolic networks from two *Blattabacterium cuneoti* strains, primary endosymbionts of cockroaches. *BMC Microbiology*, 12(Suppl 1), S5.
- Jamshidi, N. and Palsson, B. Ø. (2007). Investigating the metabolic capabilities of *Mycobacterium tuberculosis* H37Rv using the *in silico* strain iNJ661 and proposing alternative drug targets. *BMC Systems Biology*, 1(26).
- King, Z. A., Lu, J., Dräger, A., Miller, P., Federowicz, S., Lerman, J. A., Ebrahim, A., Palsson, B. Ø., and Lewis, N. E. (2016). BiGG Models: A platform for integrating, standardizing and sharing genome-scale models. *Nucleic Acids Research*, 44(D1), D515–D522.
- Klamt, S. (2006). Generalized concept of minimal cut sets in biochemical networks. *Biosystems*, 83(2–3), 233–247.
- Li, C., Donizelli, M., Rodriguez, N., Dharuri, H., Endler, L., Chelliah, V., Li, L., He, E., Henry, A., Stefan, M. I., et al. (2010). BioModels Database: An enhanced, curated and annotated resource for published quantitative kinetic models. *BMC Systems Biology*, 4(92).
- MacDonald, S. J., Thomas, G. H., and Douglas, A. E. (2011). Genetic and metabolic determinants of nutritional phenotype in an insect–bacterial symbiosis. *Molecular Ecology*, 20(10), 2073–2084.
- Orth, J. D., Fleming, R. M., and Palsson, B. Ø. (2010). Reconstruction and Use of Microbial Metabolic Networks: the Core *Escherichia coli* Metabolic Model as an Educational Guide. *EcoSal plus*.
- Resendis-Antonio, O., Reed, J. L., Encarnación, S., Collado-Vides, J., and Palsson, B. Ø. (2007). Metabolic Reconstruction and Modeling of Nitrogen Fixation in *Rhizobium etli*. *PLoS Computational Biology*, 3(10), e192.
- Schilling, C. H., Covert, M. W., Famili, I., Church, G. M., Edwards, J. S., and Palsson, B. Ø. (2002). Genome-Scale Metabolic Model of *Helicobacter pylori* 26695. *Journal of Bacteriology*, 184(16), 4582–4593.
- Schuster, S. and Hilgetag, C. (1994). On elementary flux modes in biochemical reaction systems at steady state. *Journal of Biological Systems*, 2(02), 165–182.

- 
- Terzer, M. (2009). *Large scale methods to enumerate extreme rays and elementary modes*. Ph.D. thesis, ETH Zurich.
- The Sage Developers (2016). *SageMath, the Sage Mathematics Software System (Version 7.4.1)*. <http://www.sagemath.org>.
- Thiele, I., Hyduke, D. R., Steeb, B., Fankam, G., Allen, D. K., Bazzani, S., Charusanti, P., Chen, F.-C., Fleming, R. M. T., Hsiung, C. A., *et al.* (2011). A community effort towards a knowledge-base and mathematical model of the human pathogen *Salmonella* Typhimurium LT2. *BMC Systems Biology*, **5**, 8.
- Tobalina, L., Pey, J., and Planes, F. J. (2016). Direct calculation of minimal cut sets involving a specific reaction knock-out. *Bioinformatics*, **32**(13), 2001–2007.
- von Kamp, A., Thiele, S., Hädicke, O., and Klamt, S. (2017). Use of *CellNetAnalyzer* in biotechnology and metabolic engineering. *J Biotechnol.*, **261**, 221–228.
- Ziegler, G. M. (1995). *Lectures on Polytopes*, volume 152. Springer Science & Business Media.
